# Supplementary material for: A tumor microenvironment-responsive microneedle patch for chemodynamic therapy of oral squamous cell carcinoma
Source: Royal Society of Chemistry journal article supplement (doi:10.1039/d3na00527e), 2023-01-01
Supplement: d3na00527e1.pdf [file d3na00527e1.pdf]

## Supporting Information

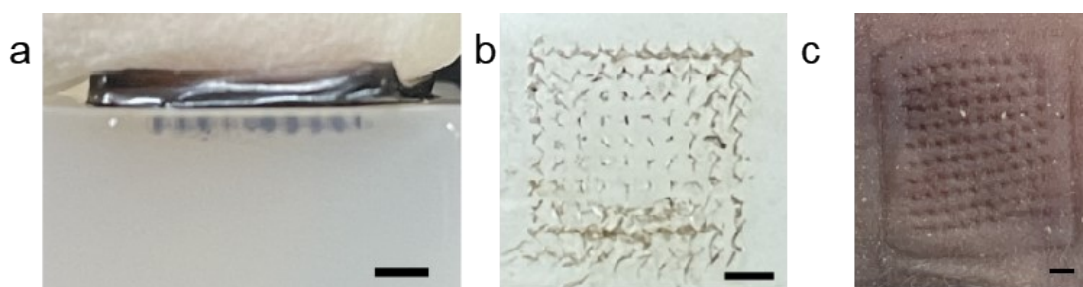

**Fig. S1** a) Schematic diagram of the microneedle ascent into the agar surface. b) Image of the agar surface after microneedle puncture. c) Schematic diagram of the skin surface of a nude mouse after microneedle application. Scale bar = 2 mm.

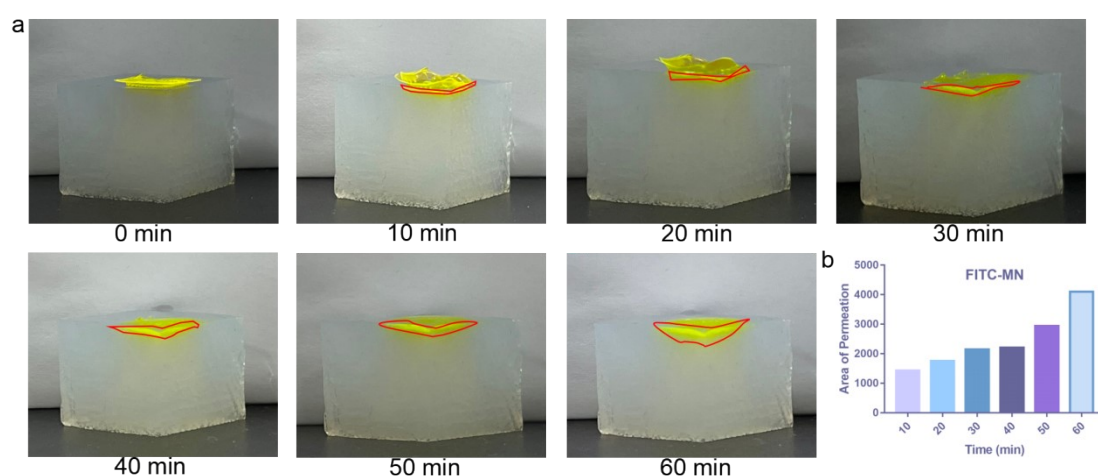

**Fig. S2** a) Dissolution of FITC-MN at different time points on the agar surface. b) Proportion of the released area at different time points of FITC-MN.

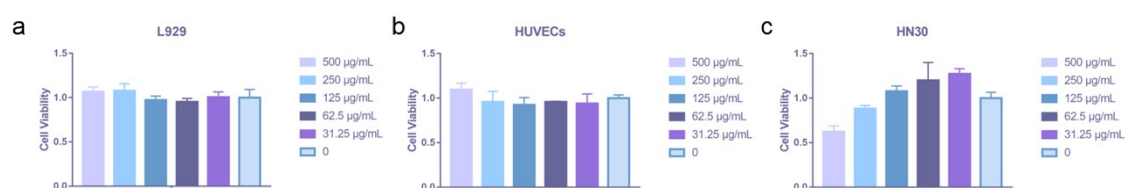

**Fig. S3** CCK8 assay results after different cells were treated with different concentrations of  $\text{Fe}_3\text{O}_4 + \text{VC-MN}$  extract. a) Viability of L929 cells treated with the microneedle extract. b) Viability of HUVECs treated with the microneedle extract. c) Viability of HN30 cells treated with the microneedle extract.

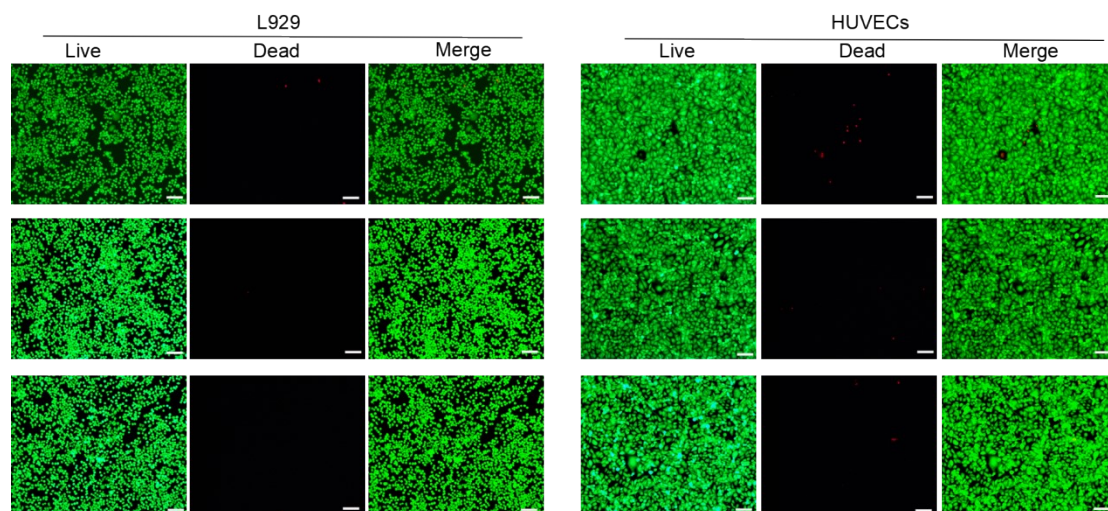

**Fig. S4** Dead and alive L929 cells and HUVECs in different groups. Scale bar=200  $\mu$ m.

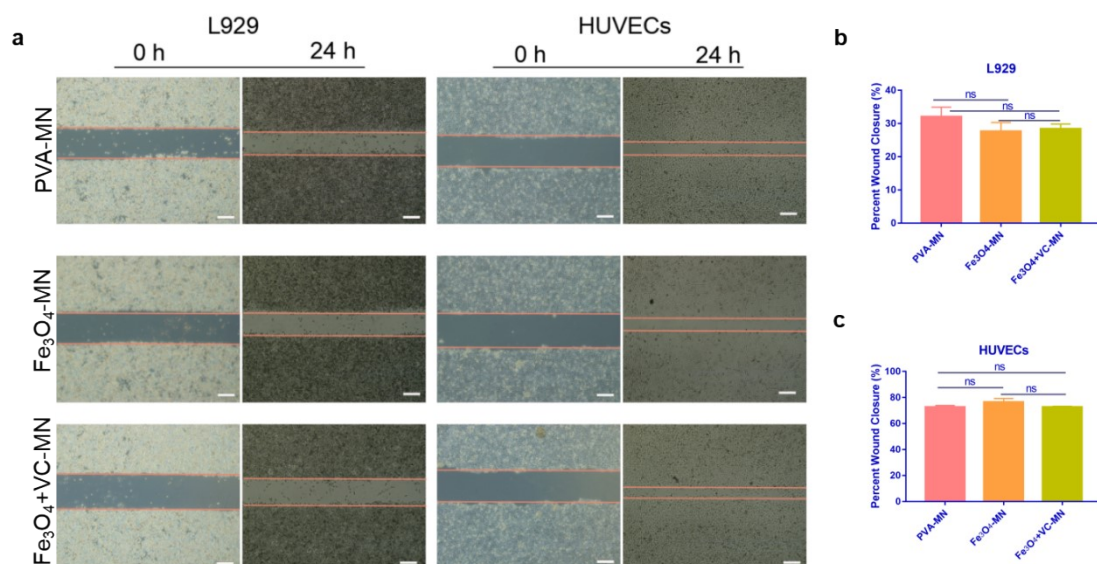

**Fig. S5** Cell scratch assay results after different cells were treated with different microneedle extracts. a) Migration of L929 cells and HUVECs after scratching in different groups. b) Proportions of L929 cells in different groups that healed after scratching. c) Proportions of HUVECs in different groups that healed after scratching. Scale bar=200  $\mu$ m. NS,  $p > 0.05$ , \* $p < 0.05$ , \*\* $p < 0.01$ , \*\*\* $p < 0.001$ .

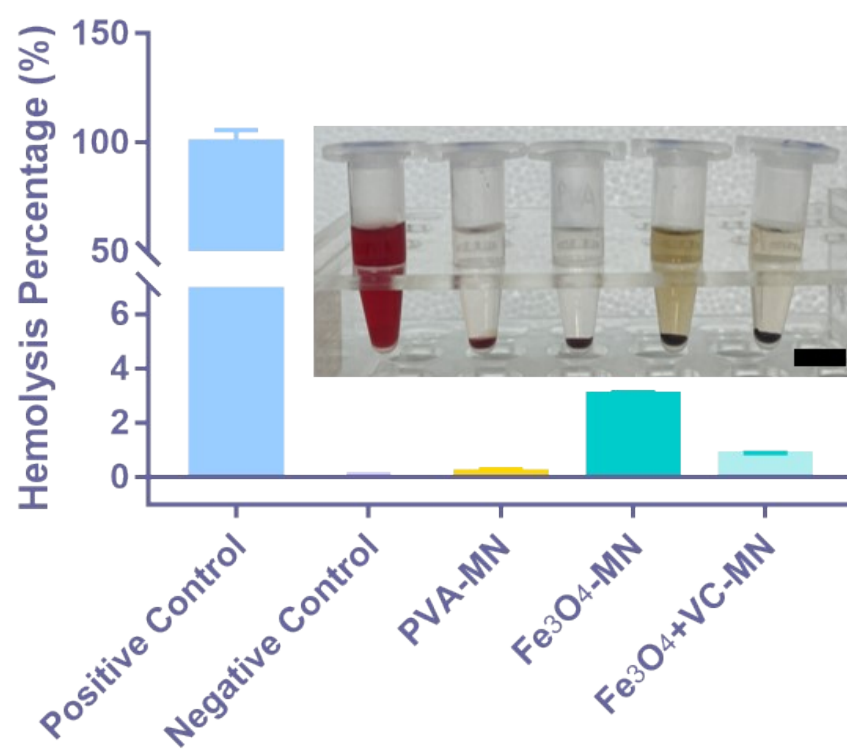

**Fig. S6** Hemolysis rates of different groups. Scale bar =1 cm.

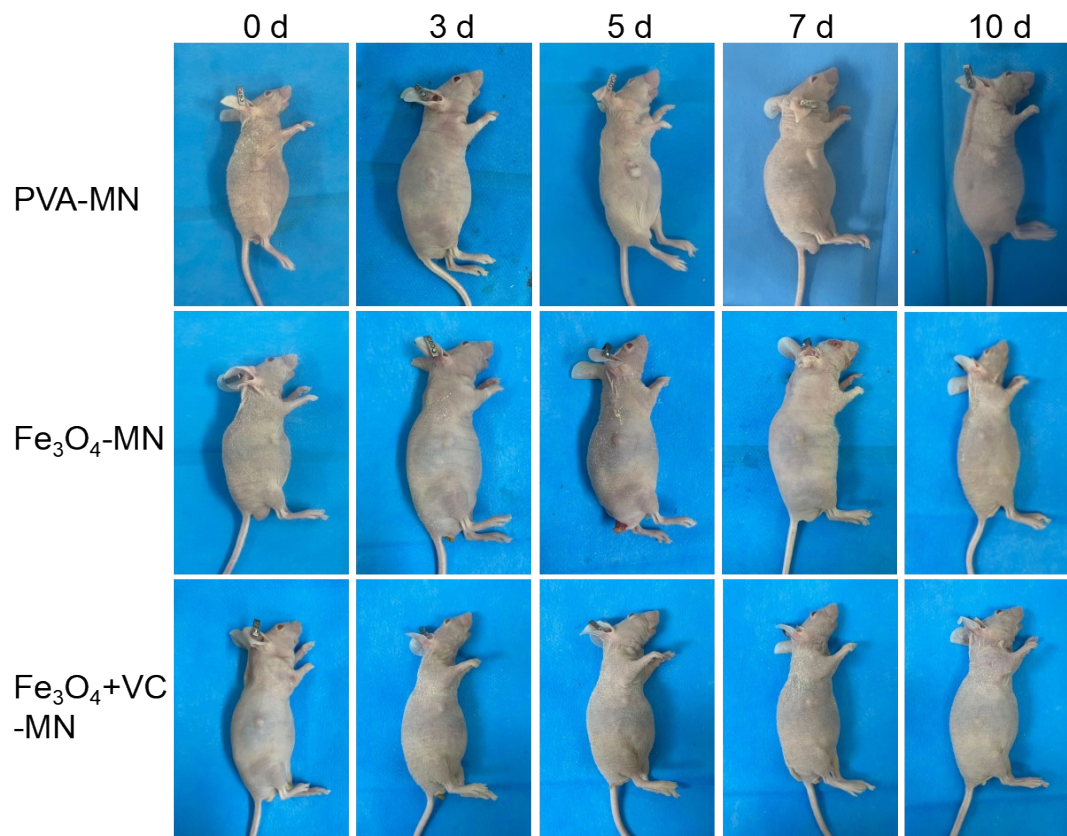

**Fig. S7** Full-body photographs of nude mice with tumours in different groups at

different time points.

|              | Normal Range                    | PVA-MN | Fe <sub>3</sub> O <sub>4</sub> -<br>MN | Fe <sub>3</sub> O <sub>4</sub> +VC-<br>MN |
|--------------|---------------------------------|--------|----------------------------------------|-------------------------------------------|
| <b>RBC</b>   | 6.36-9.42 (10 <sup>12</sup> /L) | 7.66   | 9.24                                   | 8.85                                      |
| <b>WBC</b>   | 0.8-6.8 (10 <sup>9</sup> /L)    | 6.1    | 6.0                                    | 6.7                                       |
| <b>PLT</b>   | 450-1590 (10 <sup>9</sup> /L)   | 623    | 787                                    | 841                                       |
| <b>LYMPH</b> | 0.7-5.7 (10 <sup>9</sup> /L)    | 3.5    | 2.5                                    | 2.1                                       |
| <b>MON</b>   | 0.0-0.3 (10 <sup>9</sup> /L)    | 0.3    | 0.4                                    | 0.4                                       |
| <b>HGB</b>   | 110-143 (g/L)                   | 115    | 144                                    | 128                                       |

**Table. S1** Routine blood test of nude mice in different groups after treatment for 10 days.
